# Supplementary material
Source: PubMed Central journal article supplement (PMC7112102)
Supplement: mmc1.pdf [file mmc1.pdf]

## Supplementary Figure 1.

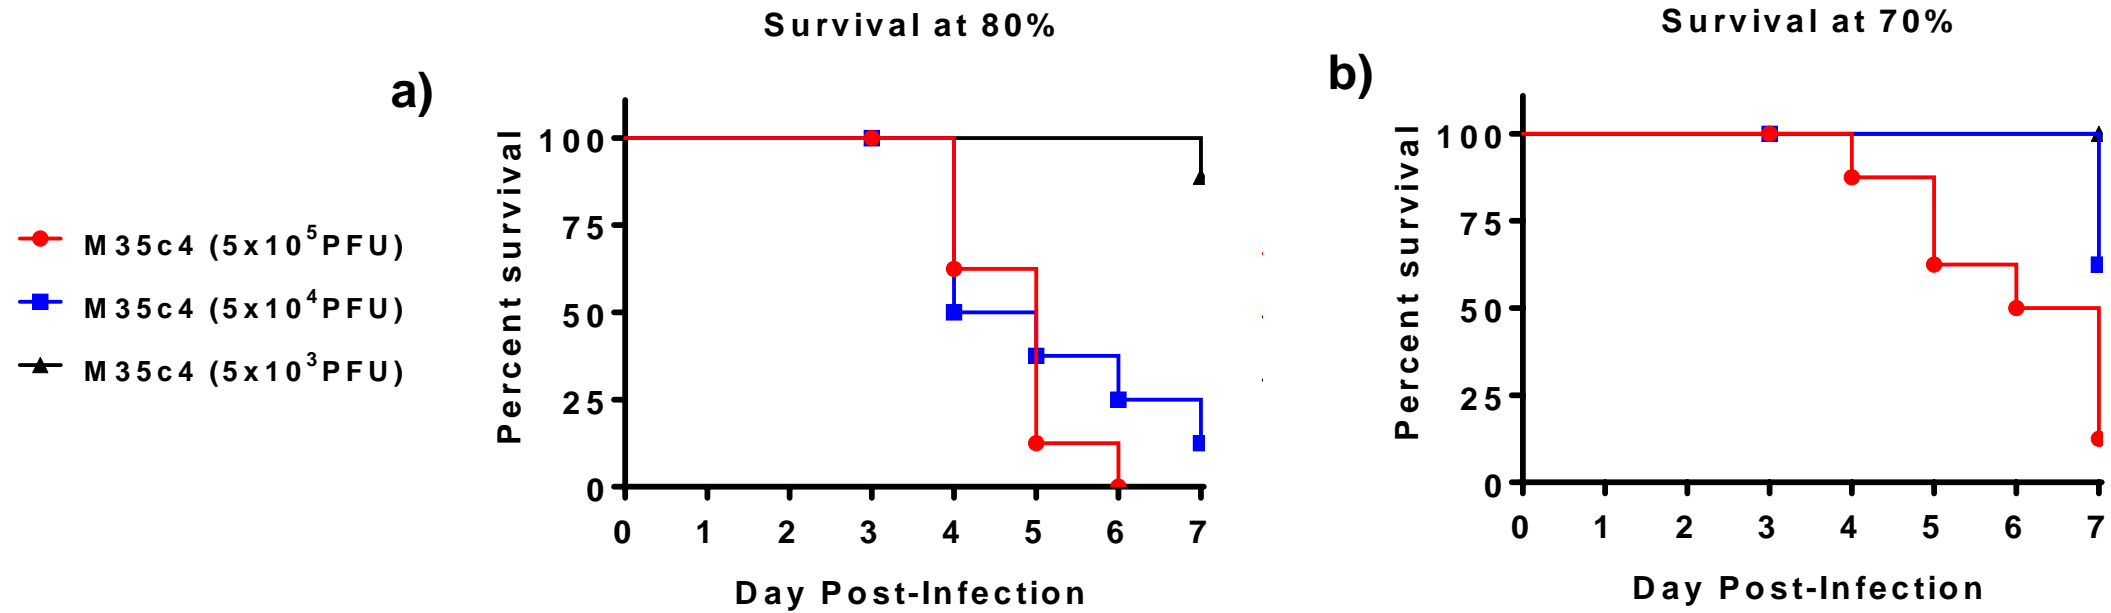

**Supplementary Figure 1.** Mice were infected intranasally with  $5 \times 10^3$  ( $n = 13$ , black triangles),  $5 \times 10^4$  ( $n = 12$ , blue squares), or  $5 \times 10^5$  ( $n = 12$ , red circles) PFU of maM35c4, as described in figure 2. Using the same data presented in figure 2 survival of mice was also plotted using survival after 20% weight loss (a), or survival after 30% weight loss (b).
